# Supplementary material for: Perfluorooctanoic Acid (PFOA) Exposures and Incident Cancers among Adults Living Near a Chemical Plant
Source: PubMed Central journal article supplement (PMC3855514; doi:10.1289/ehp.1306615), 2013-09-05
Supplement: ehp.1306615.s001.508.pdf [file ehp.1306615.s001.508.pdf]

**SUPPLEMENTAL MATERIAL**

**Perfluorooctanoic Acid (PFOA) Exposures and Incident Cancers among Adults  
Living Near a Chemical Plant**

Vaughn Barry, Andrea Winquist, and Kyle Steenland

**Table of Contents**

Supplemental Material, Table S1: Reported cancer in community and occupational cohorts.....2

Supplemental Material, Table S2: Cancer risk using continuous exposure.....3

Supplemental Material, Table S3: Cancer risk using quartiles of exposure.....5

Supplemental Material, Table S1. Number of reported and validated<sup>a</sup> primary cancer cases among community (n=28,541) and occupational (n=3,713) groups

| Cancer      | Community         |                              | Occupational     |                              |
|-------------|-------------------|------------------------------|------------------|------------------------------|
|             | # reported        | # validated<br>(% validated) | # reported       | # validated<br>(% validated) |
| Bladder     | 83                | 80 (96.4)                    | 32               | 31 (96.9)                    |
| Brain       | 26                | 18 (69.2)                    | 7                | 5 (71.4)                     |
| Breast      | 589               | 566 (96.1)                   | 19               | 15 (79.0)                    |
| Cervical    | 369               | 21 (5.7)                     | 14               | 1 (7.1)                      |
| Colorectal  | 264               | 232 (87.9)                   | 47               | 44 (93.6)                    |
| Esophagus   | 16                | 12 (75.0)                    | 5                | 3 (60.0)                     |
| Kidney      | 102               | 94 (92.2)                    | 22               | 19 (86.4)                    |
| Leukemia    | 62                | 55 (88.7)                    | 17               | 14 (82.4)                    |
| Liver       | 16                | 9 (56.3)                     | 2                | 1 (50.0)                     |
| Lung        | 113               | 97 (85.8)                    | 20               | 16 (80.0)                    |
| Lymphoma    | 145               | 126 (86.9)                   | 19               | 16 (84.2)                    |
| Melanoma    | 444               | 204 (46.0)                   | 75               | 41 (54.7)                    |
| Oral        | 32                | 19 (59.4)                    | 3                | 1 (33.3)                     |
| Ovarian     | 85                | 43 (50.6)                    | 2                | 0 (0)                        |
| Pancreatic  | 26                | 22 (84.6)                    | 9                | 4 (44.4)                     |
| Prostate    | 354               | 322 (91.0)                   | 161              | 136 (84.5)                   |
| Soft Tissue | 20                | 14 (70.0)                    | 5                | 3 (60.0)                     |
| Stomach     | 26                | 11 (42.3)                    | 3                | 1 (33.3)                     |
| Testicular  | 27                | 17 (63.0)                    | 5                | 2 (40.0)                     |
| Thyroid     | 87                | 79 (90.8)                    | 11               | 8 (72.7)                     |
| Uterine     | 213               | 98 (46.0)                    | 12               | 7 (58.3)                     |
| TOTAL       | 3099 <sup>b</sup> | 2139 (69.0)                  | 490 <sup>c</sup> | 368 (75.1)                   |

<sup>a</sup>Validated cases were limited to participants who reported the cancer and were subsequently confirmed either by Ohio/West Virginia cancer registry or medical record review; participants reported whether a doctor had ever told them they had a cancer or malignancy of any kind

<sup>b</sup>These 3,099 cancers were self-reported by 2,851 participants; some participants reported more than 1 cancer type

<sup>c</sup>These 490 cancers were self-reported by 441 participants; some participants reported more than 1 cancer type

Supplemental Material, Table S2. Hazard ratios and 95% confidence intervals assessing the effect of logged estimated cumulative PFOA serum concentration on cancer risk in the community (n=28,541) and occupational (n=3,713) groups

|                     |              | NO LAG  |                          |         | 10 YEAR LAG |                          |         |
|---------------------|--------------|---------|--------------------------|---------|-------------|--------------------------|---------|
|                     |              | # cases | HR (95% CI) <sup>a</sup> | p-value | # cases     | HR (95% CI) <sup>a</sup> | p-value |
| Cancer <sup>b</sup> | Group        |         |                          |         |             |                          |         |
| Bladder             | Community    | 76      | 0.96 (0.81, 1.14)        | 0.65    | 76          | 0.90 (0.75, 1.09)        | 0.29    |
|                     | Occupational | 29      | 0.65 (0.44, 0.95)        | 0.02    | 29          | 0.73 (0.55, 0.98)        | 0.04    |
| Brain               | Community    | 13      | 1.14 (0.78, 1.65)        | 0.50    | 13          | 1.02 (0.68, 1.52)        | 0.94    |
|                     | Occupational | 4       | 0.82 (0.26, 2.59)        | 0.74    | 4           | 0.73 (0.32, 1.67)        | 0.46    |
| Breast              | Community    | 546     | 0.96 (0.90, 1.02)        | 0.16    | 546         | 0.95 (0.89, 1.01)        | 0.11    |
|                     | Occupational | 13      | 1.01 (0.59, 1.74)        | 0.97    | 13          | 1.03 (0.59, 1.79)        | 0.92    |
| Cervical            | Community    | 21      | 0.94 (0.67, 1.32)        | 0.74    | 21          | 1.02 (0.72, 1.43)        | 0.92    |
|                     | Occupational | 1       | ---                      | ---     | 1           | ---                      | ---     |
| Colorectal          | Community    | 223     | 0.98 (0.89, 1.08)        | 0.75    | 223         | 0.98 (0.89, 1.09)        | 0.77    |
|                     | Occupational | 41      | 1.12 (0.81, 1.54)        | 0.50    | 41          | 1.08 (0.84, 1.39)        | 0.55    |
| Esophagus           | Community    | 12      | 1.00 (0.66, 1.51)        | 0.99    | 12          | 1.01 (0.67, 1.52)        | 0.96    |
|                     | Occupational | 3       | 1.42 (0.21, 9.74)        | 0.72    | 3           | 1.17 (0.19, 7.36)        | 0.86    |
| Kidney              | Community    | 87      | 1.14 (0.99, 1.32)        | 0.07    | 87          | 1.11 (0.96, 1.29)        | 0.17    |
|                     | Occupational | 18      | 0.95 (0.59, 1.52)        | 0.82    | 18          | 0.99 (0.67, 1.46)        | 0.97    |
| Leukemia            | Community    | 53      | 0.92 (0.76, 1.13)        | 0.43    | 53          | 0.92 (0.75, 1.13)        | 0.41    |
|                     | Occupational | 13      | 1.30 (0.73, 2.33)        | 0.37    | 13          | 1.30 (0.78, 2.18)        | 0.31    |
| Liver               | Community    | 8       | 0.62 (0.29, 1.29)        | 0.20    | 8           | 0.53 (0.21, 1.34)        | 0.18    |
|                     | Occupational | 1       | ---                      | ---     | 1           | ---                      | ---     |
| Lung                | Community    | 95      | 0.85 (0.73, 1.00)        | 0.05    | 95          | 0.89 (0.76, 1.05)        | 0.17    |
|                     | Occupational | 13      | 0.87 (0.51, 1.47)        | 0.59    | 13          | 1.04 (0.68, 1.58)        | 0.86    |
| Lymphoma            | Community    | 121     | 1.05 (0.92, 1.19)        | 0.48    | 121         | 1.02 (0.89, 1.17)        | 0.80    |
|                     | Occupational | 15      | 1.24 (0.72, 2.14)        | 0.45    | 15          | 1.10 (0.73, 1.65)        | 0.66    |
| Melanoma            | Community    | 200     | 0.99 (0.89, 1.10)        | 0.82    | 200         | 1.02 (0.92, 1.14)        | 0.66    |
|                     | Occupational | 41      | 0.80 (0.59, 1.08)        | 0.15    | 41          | 0.93 (0.73, 1.18)        | 0.53    |
| Oral                | Community    | 17      | 0.96 (0.65, 1.40)        | 0.82    | 17          | 0.77 (0.47, 1.27)        | 0.31    |
|                     | Occupational | 1       | ---                      | ---     | 1           | 0.70 (0.19, 2.62)        | 0.60    |
| Ovarian             | Community    | 43      | 1.00 (0.79, 1.25)        | 0.97    | 43          | 0.94 (0.73, 1.22)        | 0.66    |
|                     | Occupational | 0       | ---                      | ---     | 0           | ---                      | ---     |
| Pancreatic          | Community    | 21      | 1.06 (0.79, 1.43)        | 0.68    | 21          | 0.98 (0.72, 1.34)        | 0.92    |
|                     | Occupational | 3       | 0.98 (0.21, 4.65)        | 0.98    | 3           | 1.14 (0.33, 3.89)        | 0.84    |
| Prostate            | Community    | 317     | 0.97 (0.90, 1.05)        | 0.50    | 317         | 0.98 (0.90, 1.06)        | 0.58    |
|                     | Occupational | 129     | 0.94 (0.77, 1.17)        | 0.59    | 129         | 0.98 (0.83, 1.16)        | 0.83    |
| Soft Tissue         | Community    | 13      | 0.68 (0.40, 1.14)        | 0.14    | 13          | 0.64 (0.36, 1.13)        | 0.12    |
|                     | Occupational | 2       | 1.20 (0.30, 4.76)        | 0.80    | 2           | 0.91 (0.25, 3.33)        | 0.89    |
| Stomach             | Community    | 11      | 0.70 (0.40, 1.23)        | 0.22    | 11          | 0.74 (0.41, 1.31)        | 0.30    |
|                     | Occupational | 1       | ---                      | ---     | 1           | ---                      | ---     |
| Testicular          | Community    | 15      | 1.73 (1.24, 2.40)        | 0.01    | 15          | 1.53 (1.09, 2.15)        | 0.01    |
|                     | Occupational | 2       | 0.85 (0.04, 19.7)        | 0.92    | 2           | 1.61 (0.21, 12.20)       | 0.65    |

|         |              | NO LAG  |                          |         | 10 YEAR LAG |                          |         |
|---------|--------------|---------|--------------------------|---------|-------------|--------------------------|---------|
|         |              | # cases | HR (95% CI) <sup>a</sup> | p-value | # cases     | HR (95% CI) <sup>a</sup> | p-value |
| Thyroid | Community    | 78      | 1.04 (0.89, 1.23)        | 0.61    | 78          | 1.00 (0.84, 1.20)        | 0.96    |
|         | Occupational | 8       | 1.93 (1.00, 3.71)        | 0.05    | 8           | 1.12 (0.61, 2.05)        | 0.71    |
| Uterine | Community    | 96      | 1.02 (0.88, 1.18)        | 0.79    | 96          | 0.99 (0.84, 1.16)        | 0.88    |
|         | Occupational | 7       | 1.05 (0.56, 1.97)        | 0.88    | 7           | 0.96 (0.42, 2.18)        | 0.92    |

<sup>a</sup> per unit of log estimated cumulative PFOA serum concentration

<sup>b</sup> A proportional hazards regression model was run for each cancer. Each model was adjusted for time-dependent smoking, time-dependent alcohol consumption, gender, education, and stratified by 5-year period of birth year. Time began at age 20 if the person's 20<sup>th</sup> birthday was in 1952 or later. Otherwise time began at the age the person was in 1952. Time ended at age of cancer diagnosis, age at last follow-up survey, or age on December 31<sup>st</sup> 2011, whichever came first.

--- model did not converge

Supplemental Material, Table S3. Hazard ratios and 95% confidence intervals by PFOA quartile<sup>a</sup> for thyroid, kidney, and testicular cancer cases among the community (n=28,541) and occupational (n=3,713) groups

| Group        | Cancer               | #cases | Hazard Ratio (95% CI) <sup>b</sup> |                   |                    |                     | p-value <sup>c</sup> |
|--------------|----------------------|--------|------------------------------------|-------------------|--------------------|---------------------|----------------------|
|              |                      |        | Quartile 1 (Reference)             | Quartile 2        | Quartile 3         | Quartile 4          |                      |
| Community    | Kidney–no lag        | 87     | 1.00                               | 1.34 (0.71, 2.52) | 1.95 (1.03, 3.70)  | 2.04 (1.07, 3.88)   | 0.20                 |
|              | Kidney –10 yr lag    | 87     | 1.00                               | 0.94 (0.45, 1.99) | 1.08 (0.52, 2.25)  | 1.50 (0.72, 3.13)   | 0.02                 |
| Occupational | Kidney–no lag        | 18     | 1.00                               | 0.84 (0.21, 3.4)  | 4.20 (1.07, 16.44) | 0.83 (0.20, 3.55)   | 0.54                 |
|              | Kidney –10 yr lag    | 18     | 1.00                               | 1.22 (0.28, 5.3)  | 3.27 (0.76, 14.10) | 0.99 (0.21, 4.68)   | 0.42                 |
| Community    | Testicular–no lag    | 15     | 1.00                               | 0.80 (0.16, 3.97) | 3.07 (0.61, 15.36) | 5.80 (0.97, 34.58)  | 0.05                 |
|              | Testicular–10 yr lag | 15     | 1.00                               | 0.98 (0.13, 7.14) | 1.54 (0.19, 12.21) | 4.66 (0.52, 41.63)  | 0.02                 |
| Occupational | Testicular–no lag    | 2      | ---                                | ---               | ---                | ---                 | ---                  |
|              | Testicular–10 yr lag | 2      | ---                                | ---               | ---                | ---                 | ---                  |
| Community    | Thyroid–no lag       | 78     | 1.00                               | 1.54 (0.73, 3.26) | 1.71 (0.81, 3.59)  | 1.40 (0.66, 2.97)   | 0.46                 |
|              | Thyroid–10 yr lag    | 78     | 1.00                               | 2.09 (0.91, 4.82) | 1.92 (0.82, 4.50)  | 1.42 (0.60, 3.37)   | 0.56                 |
| Occupational | Thyroid–no lag       | 8      | 1.00                               | 4.64 (0.42, 50.8) | 9.70 (0.67, 141.2) | 14.72 (0.85, 253.9) | 0.04                 |
|              | Thyroid–10 yr lag    | 8      | 1.00                               | 1.65 (0.09, 31.5) | 4.52 (0.10, 198.4) | 5.85 (0.13, 257.1)  | 0.01                 |

<sup>a</sup> 95% confidence intervals by PFOA quartile\* so that they now meet the supplemental material formatting requirements. Quartiles were defined by the estimated cumulative PFOA serum concentration among the thyroid, kidney, or testicular cancer cases at the time of cancer diagnosis

<sup>b</sup> A proportional hazards regression model was run for each cancer. Each model was adjusted for time-dependent smoking, time-dependent alcohol consumption, gender, education, and stratified by 5-year period of birth year. Time began at age 20 if the person’s 20<sup>th</sup> birthday was in 1952 or later. Otherwise time began at the age the person was in 1952. Time ended at age of cancer diagnosis, age at last follow-up survey, or age on December 31<sup>st</sup> 2011, whichever came first.

<sup>c</sup> P-value is for linear trend test in log rate ratios across quartiles. P-values were calculated using exposure category mid-points and inverse variance weighting in a no-intercept linear regression model.

--- Not enough cases for quartile analysis
